# Supplementary material for: The combined formulation of brassinolide and pyraclostrobin increases biomass and seed yield by improving photosynthetic capacity in Arabidopsis thaliana
Source: Front Plant Sci. 2023 Mar 29;14:1138563. doi: 10.3389/fpls.2023.1138563 (PMC10090558; doi:10.3389/fpls.2023.1138563)
Supplement: Supplementary file 2 [file Table_1.xlsx]

## Sheet: Table S4
gene_id	gene_name	PvsCK_P	PvsCK_CK	PvsCK_log2FoldChange	PvsCK_pvalue	PvsCK_padj	PandBvsCK_PandB	PandBvsCK_CK	PandBvsCK_log2FoldChange	PandBvsCK_pvalue	PandBvsCK_padj	BvsCK_B	BvsCK_CK	BvsCK_log2FoldChange	BvsCK_pvalue	BvsCK_padj	PandBvsP_PandB	PandBvsP_P	PandBvsP_log2FoldChange	PandBvsP_pvalue	PandBvsP_padj	PandBvsB_PandB	PandBvsB_B	PandBvsB_log2FoldChange	PandBvsB_pvalue	PandBvsB_padj	BvsP_B	BvsP_P	BvsP_log2FoldChange	BvsP_pvalue	BvsP_padj
AT3G54890	LHCA1	58617.3	82187.2	-0.487623	0	0	106463	113316	-0.0899365	2.6e-08	2.59e-07	100784	117704	-0.21959	4.21e-05	0.00069482	76116	58025.1	0.390803	1.5e-123	8.88e-121	109575	99267.9	0.14136	0.0120393	0.0389707	72042.7	60184.5	0.257549	5.64e-06	4.54e-05
AT5G28450	-	260.79	530.398	-0.996066	2.18e-29	8.24e-28	626.286	731.294	-0.218147	0.00120798	0.0057273	635.614	759.601	-0.090984	0.62626	0.845354	447.787	258.155	0.743652	1.82e-16	8.84e-15	644.579	626.857	0.023478	0.939583	0.967839	455.177	267.761	0.461351	0.153676	0.292859
AT3G61470	LHCA2	45661.3	54906.3	-0.265731	1.22e-112	2.1e-110	70464.1	75702.5	-0.103378	1.77e-07	1.61e-06	76634.7	78633.9	-0.0365002	0.473353	0.749328	50377.9	45200	0.155884	3.86e-15	1.7e-13	72524.6	75478.1	-0.0571691	0.294368	0.462315	54776.4	46882.2	0.223029	3.27e-05	0.000221025
AT1G61520	LHCA3	54009.9	66060.6	-0.290468	1.19e-183	4.08e-181	86421.9	91081.7	-0.0757181	1.07e-05	7.56e-05	90694.6	94608.7	-0.0599537	0.225679	0.522801	61787.3	53464.2	0.20826	2.73e-35	3.14e-33	88948.7	89322.7	-0.00602402	0.907791	0.950182	64823	55454	0.223842	1.44e-05	0.000106755
AT3G47470	LHCA4	105027	122449	-0.221396	1.01e-137	2.29e-135	148739	168827	-0.182616	3.22e-31	1.11e-29	160984	175365	-0.121275	0.0179471	0.101748	106341	103966	0.0325375	0.0313103	0.130157	153087	158557	-0.0502767	0.349414	0.521553	115069	107835	0.0930595	0.0833306	0.186247
AT4G17600	LIL3.1	1337.18	1453.52	-0.119452	0.00927751	0.0337077	2506.34	2004.08	0.321327	6.05e-17	1.15e-15	1793.17	2081.67	-0.206232	0.00554507	0.0416622	1791.92	1323.67	0.430511	1.22e-21	8.56e-20	2579.61	1766.43	0.537246	2.6e-12	4.86e-11	1282.03	1372.93	-0.096467	0.245484	0.410686
AT4G34190	1-Sep	2619.5	2315.4	0.177374	6.51e-07	5.83e-06	3988.64	3192.4	0.319954	4.08e-23	1.03e-21	3549.81	3316.04	0.096042	0.0971569	0.322393	2851.66	2593.03	0.135595	0.000203404	0.00203326	4105.27	3496.14	0.229599	0.000112314	0.000662791	2537.23	2689.58	-0.0833878	0.192376	0.34491
AT2G21970	2-Sep	625.021	857.956	-0.451475	1.39e-12	2.18e-11	966.577	1182.89	-0.289371	5.91e-08	5.68e-07	1642.25	1228.7	0.403093	3.19e-08	1.05e-06	691.052	618.708	0.154285	0.0185133	0.08698	994.84	1617.63	-0.690646	4.43e-19	1.48e-17	1174.01	641.725	0.856513	2.28e-23	1.21e-21
AT2G34430	LHB1B1	34297	44480.3	-0.374653	1.51e-214	7.08e-212	58666.3	61327.7	-0.0639692	0.00478955	0.0193187	39236.8	63702.4	-0.686602	3.57e-40	1.36e-37	41942.8	33950.4	0.303649	2.14e-40	2.99e-38	60382	38643.3	0.638556	1.91e-29	1.36e-27	28044	35214.2	-0.326201	1.89e-09	2.76e-08
AT1G29920	LHCB1.1	85341.8	92389.8	-0.11451	1.23e-29	4.74e-28	133812	127383	0.0708824	0.00096986	0.00470006	115495	132316	-0.192395	0.000329659	0.00412169	95667.9	84479.6	0.178839	3.75e-18	2.11e-16	137726	113757	0.273455	2.57e-06	2.12e-05	82557.8	87623.7	-0.0852853	0.130172	0.2605
AT1G29910	LHCB1.1	75913.2	73544.9	0.0456886	3.37e-06	2.7e-05	109269	101401	0.107597	2.5e-07	2.24e-06	75185.6	105327	-0.477944	5.69e-21	7.36e-19	78120.6	75146.2	0.0557859	0.00598902	0.0360183	112464	74050.4	0.598149	2.82e-27	1.75e-25	53740.2	77943.1	-0.532892	1.63e-23	8.75e-22
AT3G27690	LHCB2.4	18977.3	19223.3	-0.0186545	0.213188	0.38972	24337.2	26504.2	-0.122972	1.77e-10	2.16e-09	15601.4	27530.6	-0.801934	3.41e-46	1.44e-43	17400	18785.5	-0.11026	1.02e-08	2.31e-07	25048.6	15366.8	0.698593	1.21e-32	1.07e-30	11152.2	19484.7	-0.798404	1.91e-41	3.01e-39
AT2G05070	LHCB2.2	31544.8	48270	-0.613343	0	0	60544.8	66552.9	-0.136349	3.15e-14	5.12e-13	57419.5	69129.8	-0.262762	6.37e-07	1.66e-05	43286.6	31226.1	0.469963	5.44e-147	3.71e-144	62314.9	56554.2	0.138817	0.0123245	0.0397117	41043.1	32388.1	0.339258	1.13e-09	1.71e-08
AT2G05100	LHCB2.1	36848.5	62598.1	-0.76436	0	0	75518	86307.7	-0.192501	1.21e-29	3.94e-28	82383.6	89649.9	-0.119778	0.0198429	0.109347	53991.6	36476.2	0.564541	4.97e-234	4.82e-231	77726	81140.8	-0.0615826	0.256067	0.420506	58886.1	37833.6	0.633964	1.22e-31	1.11e-29
AT5G54270	LHCB3	70158.6	90394.8	-0.36542	3.64e-277	2.49e-274	113413	124633	-0.135969	4.34e-15	7.43e-14	111530	129459	-0.211352	3.14e-05	0.000535482	81084.4	69449.7	0.222967	6.56e-42	9.74e-40	116729	109847	0.0870183	0.102551	0.215544	79718.7	72034.7	0.145283	0.00624864	0.0227145
AT2G40100	LHCB4.3	1410.15	1772.37	-0.328559	6.04e-14	1.05e-12	2852.39	2443.68	0.221482	2.48e-09	2.74e-08	3417.26	2538.29	0.418697	1.68e-12	1.01e-10	2039.28	1395.91	0.538904	2.7e-33	2.93e-31	2935.81	3365.32	-0.195123	0.00159226	0.0069232	2442.21	1447.84	0.746763	5.94e-29	4.39e-27
AT3G08940	LHCB4.2	32604.8	41742.7	-0.356322	1.66e-201	6.64e-199	51135.8	57553.3	-0.169685	1.27e-05	8.91e-05	56497.2	59782.3	-0.0797467	0.160858	0.437027	36558.7	32275.4	0.178767	8.88e-12	2.85e-10	52631.6	55636	-0.079326	0.205112	0.359485	40373.9	33476.6	0.268216	3.61e-06	3.02e-05
AT4G10340	LHCB5	85749	99758.5	-0.218219	8.31e-124	1.7e-121	131199	137544	-0.0680614	3.58e-05	0.000233276	131559	142870	-0.116725	0.0287759	0.1425	93801.1	84882.7	0.143864	4.02e-20	2.57e-18	135035	129579	0.0590171	0.293334	0.461214	94040.7	88041.7	0.0944108	0.0927646	0.202245
AT1G76570	LHCB7	158.283	203.237	-0.343161	0.00532286	0.0210196	210.448	280.211	-0.396925	0.000132845	0.000777381	310.472	291.072	0.0866479	0.414144	0.706007	150.462	156.683	-0.0495945	0.679426	0.851736	216.599	305.787	-0.480794	4.15e-05	0.000272003	221.917	162.519	0.431794	0.00162551	0.0071328
ATCG00020	PSBA	855.671	333.361	1.24886	4.16e-17	8.77e-16	984.105	459.623	0.908662	5.7e-06	4.21e-05	1419.6	477.37	0.304651		1	703.487	847.023	-0.214113	0.144645	0.366506	1012.95	1396.14	-0.182931	0.551376	0.707754	1012.85	878.564	0.0856526	0.792823	0.881382
ATCG00680	PSBB	151.981	97.4284	0.587831	0.000126819	0.00076394	186.625	134.335	0.44513	0.000761858	0.00379992	196.656	139.521	0.238407	0.222075	0.51852	133.433	150.447	-0.149815	0.236038	0.491159	192.077	193.527	-0.00575136	0.983337	0.990456	140.415	156.036	-0.113767	0.697008	0.816725
ATCG00280	PSBC	164.851	108.282	0.558444	7.24e-05	0.000461204	221.099	149.293	0.53559	1.09e-05	7.71e-05	239.352	155.065	0.290417	0.136227	0.395821	158.083	163.187	-0.0353371	0.768468	0.900927	227.557	235.553	-0.0334821	0.906795	0.949619	170.913	169.254	0.00887635	0.976222	0.987593
AT1G14150	PNSL2	575.875	1090.65	-0.907851	1.31e-45	7.8e-44	1378.8	1503.71	-0.123836	0.0130547	0.0454237	1465.27	1561.96	-0.0877238	0.250826	0.552026	985.812	570.058	0.76303	8.9e-31	8.58e-29	1419.08	1443.37	-0.0247183	0.762678	0.863759	1047.55	591.261	0.808371	7.96e-18	2.86e-16
AT3G01440	PNSL3	232.978	209.568	0.148171	0.199235	0.371508	399.753	288.943	0.454454	2.41e-07	2.17e-06	309.107	300.135	0.0419703	0.692799	0.878836	285.803	230.619	0.279368	0.00672002	0.0395613	411.441	304.456	0.417983	8.58e-05	0.000521424	220.953	239.228	-0.109363	0.422082	0.593114
AT4G05180	PSBQ2	30474.4	30919.1	-0.0211352	0.0996238	0.224983	39455.2	42630.2	-0.11155	1.96e-06	1.55e-05	40010.6	44280.9	-0.143788	0.00475498	0.036854	28208	30166.6	-0.0964635	4.93e-05	0.000575089	40609.2	39406.1	0.0430263	0.446049	0.615415	28598	31289.3	-0.128884	0.0167749	0.0520318
AT4G21280	PSBQ1	19744	18609.5	0.0856045	1.3e-08	1.42e-07	27875.5	25658.1	0.119283	1.46e-08	1.49e-07	23909.7	26651.9	-0.153661	0.00359671	0.0295874	19929.4	19544.5	0.0277778	0.18991	0.43302	28690.6	23548.9	0.282564	4.24e-07	4.01e-06	17090	20271.9	-0.244543	1.04e-05	7.97e-05
AT2G30570	PSBW	41610	42764.6	-0.0395061	0.00138416	0.00655188	54756.3	58962.1	-0.106554	1.73e-07	1.58e-06	55937.6	61245	-0.126923	0.0543646	0.221525	39148.8	41189.6	-0.0730327	0.000176919	0.00179089	56356.7	55103.2	0.0320426	0.64575	0.782279	39992.7	42722.5	-0.0941904	0.175464	0.32283
AT3G55330	PPL1	1246.72	1158.13	0.105818	0.0318404	0.0932507	1778.85	1596.81	0.154772	0.000426904	0.00225919	1495.02	1658.65	-0.144991	0.0337609	0.159152	1271.78	1234.12	0.0423078	0.388017	0.644582	1830.87	1472.52	0.310172	9.86e-06	7.28e-05	1068.67	1280.05	-0.257014	0.000634038	0.00311193
AT1G76450	PPD3	1353.62	1105.85	0.290406	3.05e-09	3.6e-08	1688.09	1524.7	0.145604	0.00111754	0.00534313	1662.8	1583.74	0.0682586	0.312385	0.615189	1206.89	1339.94	-0.149264	0.00264582	0.0184926	1737.46	1637.79	0.0839013	0.23493	0.395625	1188.61	1389.84	-0.223024	0.00313229	0.0125919
AT2G28605	PPD2	336.48	275.041	0.282607	0.00259336	0.0113498	463.621	379.217	0.2843	0.000440169	0.0023232	373.191	393.906	-0.0723996	0.47415	0.749855	331.477	333.078	-0.00614417	0.944569	0.976917	477.167	367.626	0.36636	0.00047481	0.00238662	266.816	345.484	-0.361251	0.00210068	0.00894047
AT4G15510	PPD1	495.892	367.383	0.423752	2.39e-07	2.27e-06	633.724	506.537	0.318563	6.49e-06	4.74e-05	440.867	526.147	-0.238732	0.0129318	0.0798642	453.095	490.884	-0.110206	0.1567	0.384758	652.241	434.3	0.572522	7.18e-09	8.78e-08	315.209	509.137	-0.672491	1.35e-09	2.02e-08
AT3G05410	PPD7	243.27	229.516	0.0779545	0.470744	0.654663	382.196	316.442	0.262797	0.00284689	0.0122811	311.737	328.696	-0.069781	0.498392	0.765072	273.246	240.816	0.168643	0.0907579	0.27158	393.375	307.014	0.344904	0.0010675	0.00490677	222.802	249.762	-0.155931	0.21489	0.374061
AT5G11450	-	1022.7	738.645	0.463927	1.84e-16	3.76e-15	1368.31	1018.41	0.422627	5.2e-17	9.91e-16	992.504	1057.86	-0.0866601	0.286517	0.590638	978.29	1012.37	-0.047504	0.380982	0.638253	1408.29	977.715	0.516017	6.13e-10	8.71e-09	709.603	1050.05	-0.55377	4.8e-10	7.65e-09
AT5G27390	-	357.878	288.541	0.297074	0.00172736	0.00796985	480.241	397.824	0.265435	0.00105409	0.00506905	330.521	413.223	-0.302097	0.00234558	0.0209596	343.361	354.267	-0.0382321	0.671003	0.846827	494.272	325.527	0.588321	1.14e-08	1.35e-07	236.245	367.432	-0.61586	1.5e-07	1.62e-06
AT3G63540	-	1505.62	992.377	0.596082	1.31e-32	5.55e-31	1490.73	1368.29	0.123177	0.0104737	0.0377187	1642.58	1421.26	0.198021	0.023229	0.122108	1065.79	1490.42	-0.474182	5.46e-22	3.9e-20	1534.32	1618.25	-0.0752581	0.406266	0.577164	1174.55	1545.86	-0.387982	3.37e-05	0.000227513
ATCG00300	PSBZ	6.59331	5.72687	0.0715066	0.784971	0.882537	18.7527	7.8964	0.683677	0.00952813	0.0348312	12.5449	8.19946	0.172761	0.332838	0.63427	13.4082	6.52682	0.317378	0.061941	0.210197	19.3004	12.35	0.430718	0.154005	0.293063	8.96229	6.76953	0.189196	0.566924	0.717642
AT1G79040	PSBR	79669.6	89711.3	-0.171088	3.53e-17	7.48e-16	110002	123691	-0.16895	1.5e-19	3.22e-18	119683	128481	-0.0993514	0.130241	0.3853	78647.2	78864.8	-0.00385596	0.847095	0.937745	113217	117897	-0.0577189	0.40373	0.574511	85567.2	81799.3	0.0642464	0.35689	0.532011
AT3G21055	PSBTN	11500	11434.6	0.00850717	0.658143	0.801065	16854.2	15765.6	0.0959545	0.000231693	0.00129954	15687.3	16376	-0.0604507	0.315358	0.617474	12049.7	11383.8	0.0813107	0.00160919	0.012217	17347.1	15452.1	0.165073	0.0104661	0.0346667	11214.5	11807.4	-0.0736492	0.246435	0.411867
AT1G44575	PSBS	14484.2	13646.9	0.0855791	7.58e-07	6.71e-06	21413.9	18815.9	0.186493	2.53e-18	5.15e-17	19813.1	19544.4	0.0193275	0.733071	0.899331	15310.1	14337.9	0.0946686	1.63e-05	0.000213188	22039.8	19515.5	0.173882	0.00345001	0.0134919	14163.3	14871.5	-0.0697436	0.246007	0.411391
AT1G50250	FTSH1	2265.06	2945.81	-0.378429	1.43e-26	4.85e-25	3581.77	4061.54	-0.181192	2.46e-08	2.46e-07	4585.49	4218.89	0.116048	0.101387	0.331161	2560.78	2242.18	0.19	4.91e-07	8.61e-06	3686.5	4514.94	-0.288551	6.93e-05	0.00043022	3276.24	2325.61	0.488159	7.41e-11	1.31e-09
AT5G42270	FTSH5	5580.65	5957.86	-0.0940527	7.27e-05	0.000463035	8833.87	8214.48	0.104671	1.68e-05	0.000115056	8451.92	8532.53	-0.0136067	0.806005	0.930046	6315.8	5524.26	0.192073	5.01e-13	1.78e-11	9092.13	8323.27	0.126597	0.0257123	0.0725271	6040.16	5729.88	0.0752909	0.193998	0.347105
AT2G30950	VAR2	8536.74	9342.85	-0.129722	8.16e-11	1.12e-09	12164.9	12881.5	-0.082668	0.000337144	0.00182552	14303.1	13380.5	0.093962	0.109785	0.34772	8697.23	8450.47	0.0409155	0.0988909	0.288136	12520.6	14084.4	-0.168234	0.00542045	0.0198701	10220.6	8765.05	0.219737	0.000283604	0.00154319
AT1G54780	TLP18.3	4271.43	6122.54	-0.518165	1.74e-93	2.41e-91	7742.53	8441.53	-0.124207	3.79e-07	3.32e-06	8326.21	8768.4	-0.0730943	0.174254	0.456248	5535.6	4228.27	0.386267	7.49e-40	1.04e-37	7968.84	8200.57	-0.0410849	0.468934	0.636697	5951.38	4385.68	0.436923	1.76e-13	4.13e-12
AT3G27925	DEGP1	1437.22	1975.08	-0.45605	1.6e-24	4.96e-23	2377.64	2723.14	-0.195167	7.52e-08	7.16e-07	2978.1	2828.61	0.0722758	0.251163	0.552343	1699.9	1422.71	0.252745	7.73e-08	1.53e-06	2447.15	2932.63	-0.258377	6.75e-05	0.0004203	2128.14	1475.6	0.52178	1.65e-12	3.49e-11
AT2G47940	DEGP2	2428.09	1965.27	0.304443	2.84e-16	5.79e-15	3071.38	2709.66	0.180501	2.25e-07	2.03e-06	2310.05	2814.6	-0.277239	7.72e-06	0.000154731	2195.91	2403.55	-0.12914	0.000830491	0.00695022	3161.15	2274.89	0.469473	1.35e-13	2.89e-12	1650.86	2493.05	-0.588374	1.55e-18	5.92e-17
AT5G39830	DEGP8	792.557	629.637	0.328052	2.23e-07	2.13e-06	995.9	868.114	0.195143	0.00048028	0.00251154	947.1	901.733	0.0681268	0.355889	0.654534	712.012	784.544	-0.137079	0.0268296	0.115444	1025.02	932.736	0.133727	0.0769077	0.172632	676.893	813.766	-0.261828	0.00166407	0.00728288
AT1G68830	STN7	1948.16	2187.76	-0.165167	3.19e-05	0.000217273	2424.86	3016.43	-0.31333	4.2e-18	8.47e-17	3210.97	3133.22	0.0343956	0.562081	0.808412	1733.64	1928.48	-0.15249	0.000379429	0.00352836	2495.76	3162.14	-0.337954	4.48e-08	4.92e-07	2294.76	2000.23	0.195585	0.00341786	0.0135875
AT4G27800	PPH1	1667.41	2021.13	-0.27582	1.11e-11	1.63e-10	2544.24	2786.67	-0.130407	0.000289046	0.00158935	3377.73	2894.55	0.217786	0.000190576	0.00260257	1819.02	1650.56	0.138395	0.00109581	0.00884097	2618.61	3326.54	-0.342092	1.37e-08	1.61e-07	2414.11	1711.98	0.491118	3.16e-14	8.06e-13
AT2G20890	THF1	3383.39	3520.2	-0.0559856	0.0669174	0.166737	5844.55	4853.53	0.267726	3.4e-19	7.2e-18	4681.46	5041.52	-0.104384	0.0625523	0.242652	4178.67	3349.19	0.316031	3.01e-20	1.96e-18	6015.35	4610.65	0.380093	1.52e-10	2.31e-09	3346.02	3473.89	-0.0536613	0.383948	0.557773
AT1G03600	PSB27-1	3691.31	4306.75	-0.222392	1.02e-14	1.87e-13	6585.6	5938.03	0.14936	1.88e-08	1.91e-07	5391.5	6167.95	-0.188863	0.00206107	0.0188174	4708.43	3654.03	0.363952	6.31e-32	6.56e-30	6778.11	5310.6	0.34807	5.02e-08	5.48e-07	3854.16	3789.96	0.024395	0.716776	0.830231
AT4G28660	PSB28	1114.65	966.177	0.203971	9.56e-05	0.000591252	2009.96	1332.13	0.589434	8.45e-42	4.03e-40	1229.98	1383.72	-0.163228	0.029139	0.143782	1437.02	1103.38	0.374446	2.97e-14	1.18e-12	2068.73	1211.59	0.760273	9.77e-24	4.79e-22	879.336	1144.45	-0.373733	7.62e-06	6e-05
AT1G54500	-	946.751	1406.33	-0.566397	8.98e-28	3.18e-26	2116.63	1939.02	0.126923	0.00245875	0.0107871	1837.8	2014.1	-0.127079	0.0640905	0.246596	1513.33	937.191	0.678216	1.34e-37	1.7e-35	2178.48	1810.23	0.263166	0.000271053	0.00145344	1313.78	972.045	0.429121	1.13e-07	1.24e-06
AT5G51545	LPA2	335.121	412.848	-0.293968	0.000690952	0.00353116	679.916	569.214	0.252983	0.000223152	0.00125505	609.847	591.262	0.0424881	0.631759	0.847747	486.127	331.737	0.522603	3.4e-10	9.11e-09	699.78	600.738	0.215495	0.0204304	0.060449	435.998	344.075	0.332784	0.00225096	0.00949555
AT1G73060	LPA3	1249.66	1296.9	-0.0528461	0.27243	0.46033	2268.14	1788.14	0.340973	1.56e-16	2.9e-15	2005.79	1857.38	0.107967	0.089514	0.305932	1621.59	1237.04	0.383619	5.62e-16	2.65e-14	2334.47	1975.32	0.238312	0.000229877	0.00125383	1433.49	1283.07	0.158123	0.0243138	0.0707298
AT4G19100	PAM68	174.69	176.307	-0.0116948	0.92419	0.962046	300.706	243.079	0.295301	0.00286086	0.0123306	212.901	252.496	-0.223921	0.04986	0.209736	214.993	172.923	0.280226	0.0119781	0.0628195	309.495	209.668	0.542046	4e-06	3.2e-05	152.157	179.369	-0.227433	0.109492	0.228765
AT1G67700	HHL1	3407.34	3248.08	0.0695422	0.0214754	0.0678843	4976.36	4478.35	0.15182	1.03e-07	9.67e-07	4284.43	4651.78	-0.11523	0.0700198	0.261321	3557.87	3372.91	0.075935	0.0179924	0.0854047	5121.84	4220.26	0.275992	3.21e-05	0.000215867	3062.89	3498.46	-0.189659	0.00612602	0.0223294
AT4G02530	-	2221.93	2117.58	0.0683344	0.0651699	0.163265	3499.34	2919.62	0.260186	3.51e-15	6.05e-14	2896.46	3032.69	-0.0646572	0.308777	0.612491	2501.88	2199.48	0.184458	9.67e-07	1.6e-05	3601.64	2852.95	0.332601	4.07e-07	3.86e-06	2070.53	2281.31	-0.138233	0.0478906	0.121321
AT1G77510	PDIL1-2	574.978	395.973	0.526438	6.48e-12	9.69e-11	750.692	545.937	0.450081	2.26e-11	3.02e-10	738.805	567.087	0.36322	1.36e-05	0.0002577	536.7	569.166	-0.0823987	0.242811	0.498711	772.645	727.591	0.083996	0.306976	0.476741	528.013	590.362	-0.157504	0.0836368	0.186747
AT1G16720	HCF173	1914.99	2750.73	-0.518968	1.29e-43	7.44e-42	2803.97	3792.63	-0.433774	5.93e-38	2.58e-36	3912.46	3939.53	-0.00921181	0.879062	0.958475	2004.71	1895.64	0.0789802	0.0518404	0.186623	2885.95	3853.04	-0.413225	4.06e-11	6.63e-10	2796.13	1966.19	0.502937	4.83e-14	1.21e-12
AT3G15095	-	491.108	593.722	-0.271517	0.000235285	0.00134109	593.959	818.591	-0.455845	2.4e-12	3.47e-11	862.556	850.297	0.0183279	0.812144	0.932809	424.66	486.151	-0.183156	0.0198774	0.0920492	611.318	849.485	-0.46441	5.9e-08	6.35e-07	616.486	504.227	0.284638	0.00250639	0.0104134
AT1G74070	CYP26-2	397.826	417.218	-0.0658434	0.428936	0.617261	689.833	575.246	0.257964	0.000104072	0.000619968	469.697	597.52	-0.329235	0.000146293	0.00206321	493.199	393.803	0.307711	9.42e-05	0.00102602	709.999	462.558	0.605768	5.88e-12	1.05e-10	335.678	408.477	-0.276602	0.00838716	0.0292546
AT3G01480	CYP38	3119.6	3193.64	-0.0341902	0.295679	0.486875	4673.88	4403.24	0.0858322	0.0043712	0.0178158	3910.99	4573.74	-0.220899	0.000110027	0.00160787	3341.65	3088.1	0.113196	0.00146126	0.0112423	4810.49	3851.98	0.317642	1.1e-07	1.13e-06	2795.5	3202.95	-0.1943	0.00251493	0.0104467
AT1G74730	-	1418.02	1481.08	-0.0622602	0.166249	0.327386	2192.4	2042.03	0.1013	0.0105636	0.0379636	1892.7	2121.12	-0.159477	0.0119059	0.0751073	1567.45	1403.69	0.156041	0.000674485	0.00580297	2256.51	1864.1	0.271859	3.7e-05	0.000245452	1352.81	1455.93	-0.1044	0.140512	0.274715
AT5G08050	-	1655.72	1499.76	0.14113	0.00183755	0.00839747	2638	2067.85	0.349791	6.4e-19	1.34e-17	1574.14	2147.91	-0.434552	4.9e-11	2.51e-09	1886.02	1639	0.200558	4.84e-06	7.03e-05	2715.14	1550.42	0.798799	1.82e-33	1.7e-31	1125.19	1699.96	-0.587208	7.76e-16	2.33e-14
AT3G18680	-	780.931	524.611	0.56478	7.4e-18	1.62e-16	1100.39	723.31	0.598517	1.07e-25	3.01e-24	734.161	751.32	-0.032405	0.684741	0.876144	786.738	773.039	0.0255514	0.674671	0.848803	1132.54	722.958	0.637874	4.91e-16	1.27e-14	524.638	801.819	-0.601311	4.03e-12	8.17e-11
AT2G45770	CPFTSY	527.531	481.058	0.128583	0.0928507	0.213611	752.255	663.279	0.180781	0.00506309	0.0202656	636.096	688.962	-0.108205	0.190904	0.47805	537.841	522.206	0.0440244	0.55039	0.770312	774.236	626.447	0.299387	0.00039757	0.0020408	454.613	541.623	-0.244592	0.0113449	0.0376117
AT2G47450	CAO	4215.06	4655.85	-0.143096	9.48e-08	9.44e-07	7586.6	6419.29	0.240089	1.93e-19	4.11e-18	6443.42	6667.93	-0.0482619	0.397703	0.691739	5424	4172.48	0.375617	4.66e-37	5.76e-35	7808.44	6346.45	0.296199	7.69e-07	7e-06	4605.86	4327.75	0.0891121	0.147953	0.284598
AT1G32070	NSI	697.928	1124.4	-0.679591	5.32e-31	2.13e-29	1334.85	1550.29	-0.212455	1.65e-05	0.000113422	1604.66	1610.33	-0.00414923	0.957079	0.987478	954.394	690.88	0.45219	1.78e-12	6.05e-11	1373.84	1580.77	-0.198725	0.0197553	0.0588287	1147.29	716.572	0.665791	8.04e-13	1.75e-11
AT1G56500	SOQ1	1765.46	2098.09	-0.247012	5.75e-10	7.22e-09	2612.17	2892.74	-0.147076	3.21e-05	0.00021093	3004.54	3004.78	-0.000377356	0.995051	0.998577	1867.57	1747.62	0.0934304	0.0263875	0.114046	2688.55	2958.73	-0.136705	0.0293495	0.0808335	2147.11	1812.67	0.241229	0.000333682	0.00177231
ATCG00350	PSAA	129.727	55.2439	1.09282	1.23e-10	1.66e-09	171.267	76.1701	1.07188	3.57e-13	5.44e-12	167.247	79.1102	0.217998		1	122.451	128.419	-0.052589	0.688058	0.856101	176.271	164.479	0.0422353	0.891424	0.94212	119.321	133.19	-0.0693159	0.832442	0.904744
ATCG00340	PSAB	138.871	69.0004	0.909569	1.61e-08	1.74e-07	184.541	95.1315	0.88095	5.41e-10	6.39e-09	144.967	98.8049	0.169238	0.348465	0.647821	131.943	137.469	-0.0502226	0.690045	0.857223	189.932	142.587	0.234298	0.451813	0.620376	103.44	142.58	-0.271565	0.404721	0.577097
AT1G49975	-	591.823	518.486	0.186433	0.0106738	0.0378838	833.977	714.87	0.220334	0.000814097	0.00402709	654.664	742.528	-0.16812	0.10718	0.34271	596.282	585.845	0.0266842	0.707286	0.867514	858.337	645.029	0.400091	0.000286217	0.00151991	468.187	607.643	-0.364239	0.00179155	0.00777137
AT1G55670	PSAG	5502.12	3236	0.764364	1.78e-147	4.38e-145	4957.98	4461.78	0.151952	4.3e-06	3.24e-05	4761.36	4634.49	0.0381856	0.536154	0.789813	3544.68	5446.52	-0.615876	2.08e-95	1.01e-92	5102.95	4689.74	0.120502	0.0522975	0.128635	3403.55	5649.26	-0.724471	2.16e-31	1.9e-29
AT1G30380	PSAK	20988.4	29273.7	-0.479837	1.22e-212	5.44e-210	38645.3	40361.8	-0.0626304	0.00473996	0.0191498	37562.4	41924.4	-0.154689	0.00980295	0.0651917	27629.2	20776.4	0.40985	1.3e-78	4.52e-76	39775.4	36999	0.103313	0.103446	0.217004	26852.3	21549.5	0.314469	6.59e-07	6.36e-06
AT2G46820	CURT1B	15640	17050	-0.124367	2.19e-13	3.63e-12	22352.6	23507.9	-0.0723528	0.00360698	0.015104	21151.1	24417.9	-0.202902	0.000268002	0.00347167	15981.4	15482	0.0457842	0.061161	0.208744	23005.8	20832.9	0.141848	0.0175461	0.053273	15119.3	16058.1	-0.0862247	0.139124	0.272841
ATCG00520	YCF4	9.26957	3.79809	0.496558	0.0603174	0.15384	14.1213	5.23659	0.669664	0.0115213	0.0409421	12.6968	5.44108	0.287245	0.0892887	0.305431	10.0962	9.17586	0.0438843	0.796607	0.9149	14.5341	12.4842	0.145358	0.639665	0.778063	9.05566	9.51764	-0.049696	0.880503	0.935266
AT5G44650	Y3IP1	1036.03	726.614	0.506367	5.4e-19	1.26e-17	1195.09	1001.82	0.251541	1.33e-06	1.08e-05	958.781	1040.63	-0.113873	0.118812	0.364212	854.428	1025.56	-0.257918	2.93e-06	4.45e-05	1230.04	944.216	0.375874	3.23e-07	3.1e-06	685.218	1063.74	-0.625489	1.79e-15	5.16e-14
AT3G11670	DGD1	605.909	651.125	-0.101251	0.156396	0.313871	793.125	897.74	-0.176907	0.00439505	0.017902	837.769	932.534	-0.147844	0.0693676	0.259887	567.039	599.79	-0.0788766	0.276577	0.538381	816.32	824.932	-0.0149963	0.861164	0.925725	598.623	622.094	-0.0549632	0.562625	0.713711
AT5G08720	-	406.982	457.191	-0.165925	0.0428079	0.117942	529.429	630.365	-0.244488	0.000720804	0.00362061	594.594	654.768	-0.133705	0.117548	0.361904	378.537	402.874	-0.0810449	0.344125	0.604519	544.892	585.516	-0.0984546	0.3003	0.469099	424.901	417.85	0.0235843	0.820209	0.898039
ATCG00720	PETB	48.8463	22.4887	0.861493	0.000147173	0.00087474	51.3446	31.0047	0.574629	0.0070695	0.0270478	73.439	32.2026	0.334792	0.0588115	0.233098	36.7066	48.354	-0.263092	0.128215	0.339136	52.8473	72.2552	-0.237213	0.448947	0.617953	52.4244	50.1482	0.0327156	0.920799	0.957509
AT3G60370	-	382.502	279.995	0.43989	1.9e-06	1.58e-05	457.857	386.052	0.24182	0.0033111	0.0140457	418.41	401.003	0.0562681	0.558728	0.806276	327.359	378.636	-0.198305	0.0257202	0.111766	471.232	412.104	0.190466	0.0598065	0.142705	299.08	392.732	-0.38471	0.000552946	0.00276116
AT5G45680	FKBP13	1126.61	1010.34	0.154617	0.00284788	0.0122719	1682.24	1393.01	0.270513	1.98e-09	2.22e-08	1297.12	1446.96	-0.150627	0.0480834	0.204078	1202.74	1115.24	0.1081	0.0354364	0.142078	1731.41	1277.77	0.430523	5.57e-08	6.03e-07	927.369	1156.73	-0.3123	0.000259321	0.00142184
AT4G37200	HCF164	540.579	837.298	-0.61995	2.65e-20	6.66e-19	987.251	1154.46	-0.22185	3.96e-05	0.00025583	1318.18	1199.16	0.132327	0.0710161	0.264074	705.848	535.116	0.385093	1.26e-08	2.82e-07	1016.11	1298.38	-0.348384	5.37e-06	4.18e-05	942.3	555.04	0.749632	1.67e-17	5.88e-16
AT1G20340	DRT112	34788.1	39396.4	-0.179529	8.72e-48	5.41e-46	60099.7	54318.1	0.145766	4.68e-17	8.94e-16	50417.2	56421.3	-0.158723	0.00560011	0.0420431	42968.6	34436.6	0.318701	7.07e-76	2.41e-73	61856.6	49660.4	0.313879	1.71e-07	1.7e-06	36040.9	35718	0.0129064	0.831064	0.903833
AT1G60950	FD2	18059.8	16506.5	0.129099	5.37e-13	8.69e-12	31961.2	22758.4	0.489041	6.3e-101	1.08e-98	17225.8	23639.5	-0.441316	3.42e-10	1.57e-08	22851.1	17877.3	0.353122	7.26e-55	1.54e-52	32895.3	16969.4	0.941548	2.74e-37	3.31e-35	12316.2	18542.5	-0.582678	4.53e-15	1.26e-13
AT1G32550	FdC1	496.193	528.673	-0.0886139	0.238897	0.421066	837.643	728.925	0.19885	0.00120074	0.00569571	681.981	757.133	-0.140792	0.112222	0.351545	598.882	491.18	0.274501	0.000111965	0.00119241	862.127	671.824	0.350806	0.000101338	0.000605408	487.595	509.456	-0.0607137	0.555289	0.708361
AT1G30510	RFNR2	206.55	213.718	-0.0529631	0.653651	0.797783	350.221	294.652	0.239036	0.00979608	0.0356272	370.25	306.071	0.252014	0.0147341	0.0881778	250.391	204.466	0.269849	0.0109546	0.0587121	360.46	364.609	-0.015935	0.877149	0.935159	264.593	212.065	0.310422	0.0158935	0.0498137
AT4G01050	TROL	6336.41	4984.11	0.345953	1.91e-47	1.18e-45	7553.12	6871.94	0.135713	2.55e-06	1.99e-05	6876.87	7138.1	-0.0525877	0.354154	0.652872	5400.02	6272.4	-0.215067	2.62e-13	9.65e-12	7774.03	6772.04	0.197123	0.00103837	0.00478589	4914.37	6505.82	-0.401563	5.05e-12	1.02e-10
AT5G49740	FRO7	1966.45	3329.73	-0.756972	3.51e-99	5.38e-97	2362.05	4590.88	-0.954862	5.5e-176	1.79e-173	5115.3	4768.73	0.0985498	0.0986943	0.325434	1688.76	1946.58	-0.201924	1.13e-06	1.85e-05	2431.11	5037.22	-1.04031	2.28e-62	9.09e-60	3655.43	2019.01	0.847948	7.53e-39	1.02e-36
AT3G18890	TIC62	2233.77	1816.83	0.296065	3.12e-13	5.13e-12	3356.08	2505.03	0.420338	6.48e-30	2.15e-28	2276.37	2602.04	-0.18522	0.015583	0.0919057	2399.41	2211.21	0.117224	0.00280614	0.0194012	3454.22	2241.27	0.614738	9.05e-16	2.29e-14	1626.35	2293.48	-0.488426	9.86e-10	1.51e-08
AT3G16250	PNSB3	754.575	559.179	0.426174	1.1e-10	1.48e-09	919.319	770.972	0.25134	2.31e-05	0.000155103	773.571	800.815	-0.047568	0.548431	0.799421	657.284	746.948	-0.1784	0.00520668	0.032057	946.185	761.933	0.307279	0.000149651	0.000854256	552.966	774.765	-0.477846	5.16e-08	6.05e-07
AT1G71500	-	2646.45	2966.25	-0.164744	5.53e-06	4.28e-05	4361.49	4089.75	0.0928272	0.0021429	0.00952768	4232.73	4248.1	-0.0054656	0.92644	0.976366	3118.29	2619.73	0.249457	1.47e-10	4.12e-09	4488.98	4168.77	0.106133	0.0851278	0.186891	3025.4	2717.13	0.153293	0.0273763	0.0776589
AT4G23890	ndhS	572.564	616.399	-0.10468	0.133187	0.279012	712.166	849.883	-0.252089	6.46e-05	0.000401638	965.371	882.78	0.122762	0.14495	0.410495	509.147	566.781	-0.14893	0.0392777	0.15285	733	950.968	-0.367802	5.89e-05	0.00037274	690.194	587.87	0.226461	0.0196014	0.0591637
AT1G15980	PNSB1	2280.51	3024.44	-0.403653	1.98e-29	7.52e-28	3793.6	4170.01	-0.135904	1.17e-05	8.19e-05	4223.55	4331.5	-0.0354574	0.527223	0.78385	2712.24	2257.46	0.26025	1.69e-11	5.23e-10	3904.52	4159.65	-0.090686	0.120784	0.244748	3018.73	2341.5	0.36249	2.3e-08	2.86e-07
AT4G11960	PGRL1B	316.469	437.408	-0.454636	4.68e-07	4.28e-06	444.261	603.067	-0.430481	3.43e-08	3.38e-07	637.485	626.404	0.0236215	0.789526	0.92413	317.64	313.273	0.0200942	0.826367	0.928657	457.238	627.923	-0.445874	3.5e-06	2.83e-05	455.717	324.924	0.475301	8.75e-06	6.8e-05
AT4G22890	PGRL1A	5628.6	7179.97	-0.351379	4.56e-50	3.03e-48	8443.62	9899.45	-0.228843	4.32e-21	9.83e-20	10301.3	10282.7	0.00264741	0.960217	0.988526	6036.86	5571.75	0.115739	3.95e-05	0.000473195	8690.41	10145.8	-0.221654	7.29e-05	0.00045091	7363.01	5779.04	0.346993	2.09e-09	3.05e-08
AT5G59400	-	155.227	222.596	-0.487834	0.000161693	0.000952476	245.549	306.919	-0.307205	0.00242327	0.0106597	277.414	318.813	-0.181465	0.0952343	0.318195	175.56	153.662	0.168454	0.167932	0.401514	252.723	273.207	-0.108942	0.349449	0.521568	198.267	159.363	0.299746	0.0413003	0.10785
AT3G21200	GLUTRBP	562.356	528.301	0.088894	0.217514	0.395368	949.853	728.41	0.379011	1.78e-10	2.17e-09	707.708	756.629	-0.0918366	0.256996	0.558769	679.108	556.675	0.27718	3.6e-05	0.000436286	977.615	697.049	0.480121	2.23e-09	2.94e-08	505.874	577.392	-0.187031	0.0419576	0.109197
AT1G60600	ABC4	309.43	251.64	0.28434	0.00448807	0.0181033	442.017	346.941	0.337559	7.7e-05	0.000470599	290.847	360.389	-0.285352	0.00598207	0.0441753	316.011	306.306	0.0433226	0.636465	0.827589	454.947	286.449	0.646266	6.27e-10	8.88e-09	207.881	317.698	-0.588678	7.27e-07	6.98e-06
AT1G68890	PHYLLO	733.038	549.21	0.409722	9.49e-10	1.17e-08	982.274	757.229	0.370599	1.74e-10	2.12e-09	780.942	786.568	-0.0102816	0.915736	0.972345	702.277	725.635	-0.0455953	0.467818	0.709632	1010.99	768.798	0.38566	8.52e-05	0.00051825	557.841	752.623	-0.421086	6.74e-05	0.000425586
AT4G04640	ATPC1	13182.2	13782	-0.0641271	0.000119328	0.000723819	20181.7	19002.2	0.0868055	1.11e-05	7.84e-05	18636.9	19738	-0.0814039	0.106761	0.341885	14429	13049	0.144609	2.61e-12	8.67e-11	20771.7	18354.7	0.177221	0.000697347	0.00336449	13320.3	13534.7	-0.0228805	0.666391	0.79527
ATCG00120	ATPA	103.695	64.6102	0.613483	0.000235045	0.0013405	120.792	89.0812	0.402178	0.00820069	0.0307078	112.084	92.5276	0.21352	0.174378	0.456409	86.3683	102.646	-0.202133	0.160058	0.390243	124.318	110.333	0.167451	0.334923	0.506663	80.0584	106.472	-0.383321	0.043297	0.112038
AT4G09650	ATPD	10120.6	10427.8	-0.0437885	0.0226478	0.0708273	16339.9	14377.4	0.184422	2.92e-15	5.04e-14	11222.6	14934.2	-0.402291	1.3e-11	7.1e-10	11682.5	10018.3	0.221093	3.91e-17	2.02e-15	16817.4	11054.3	0.598961	4.59e-21	1.85e-19	8022.65	10391	-0.369438	8.78e-09	1.16e-07
AT4G01800	AGY1	2511.97	2602.22	-0.049342	0.171797	0.334763	4039.98	3587.85	0.170977	9.42e-08	8.87e-07	3869.95	3726.83	0.0523932	0.457699	0.739149	2888.43	2486.59	0.212891	1.48e-08	3.28e-07	4158.07	3810.41	0.124487	0.0826028	0.182611	2765.01	2579.14	0.0986314	0.192257	0.344788
AT4G16390	P67	476.249	266.991	0.808534	2.78e-19	6.57e-18	719.837	368.099	0.945222	4.58e-36	1.84e-34	349.581	382.354	-0.12029	0.246293	0.546695	514.653	471.436	0.122042	0.102142	0.293891	740.88	344.226	1.07989	1.38e-30	1.06e-28	249.792	488.992	-0.941335	3.13e-18	1.16e-16
AT4G30825	-	227.372	199.284	0.182781	0.107171	0.237854	334.428	274.763	0.274913	0.00344955	0.0145152	233.21	285.411	-0.267891	0.0164479	0.09531	239.107	225.076	0.0787555	0.447791	0.69511	344.199	229.68	0.56687	7.13e-07	6.52e-06	166.684	233.445	-0.468229	0.000502967	0.00254128
AT2G21385	-	781.866	613.178	0.344835	9.46e-08	9.43e-07	1071.61	845.421	0.338596	5.43e-09	5.82e-08	772.845	878.14	-0.174188	0.0397814	0.179513	766.177	773.969	-0.0127894	0.836664	0.93371	1102.92	761.316	0.523676	1.6e-09	2.15e-08	552.542	802.763	-0.526867	1.31e-08	1.69e-07
AT1G67840	CSK	885.758	988.839	-0.156063	0.00543091	0.0213759	1188.07	1363.37	-0.197114	5.27e-05	0.00033296	1366.27	1416.15	-0.0498837	0.462717	0.742968	849.409	876.805	-0.0458101	0.425664	0.677286	1222.8	1345.52	-0.1366	0.0533156	0.130523	976.441	909.451	0.100742	0.196377	0.350351
AT5G36170	PRFB1	796.943	748.462	0.0897189	0.161776	0.321656	1168.23	1031.98	0.178457	0.000977837	0.00473448	1105.07	1071.94	0.0428144	0.563305	0.808644	835.232	788.897	0.0808014	0.180391	0.419901	1202.38	1088.35	0.141948	0.0504901	0.12519	789.837	818.229	-0.0498534	0.546816	0.701159
AT5G54180	MTERF8	139.488	91.2852	0.552148	0.000305898	0.00169374	177.117	125.861	0.461899	0.000286825	0.00157889	113.774	130.733	-0.167355	0.240597	0.540194	126.628	138.082	-0.0998467	0.448337	0.695385	182.297	112.024	0.658425	8.92e-06	6.65e-05	81.289	143.209	-0.747165	2.43e-05	0.00016996
AT3G14330	PCMP-H57	183.958	139.66	0.374893	0.00361571	0.0150628	263.193	192.566	0.432372	6.98e-05	0.000430672	168.3	200.012	-0.21816	0.0828624	0.29104	188.168	182.098	0.0422192	0.705634	0.866666	270.888	165.757	0.678428	5.52e-08	5.97e-07	120.294	188.882	-0.617052	2.25e-05	0.000158594
AT2G35410	-	1038.32	1066.71	-0.0385817	0.46197	0.646664	1666.96	1470.73	0.18011	0.000103478	0.000616616	1350.71	1527.67	-0.171986	0.0143441	0.08652	1191.83	1027.83	0.209597	9.26e-05	0.00101177	1715.67	1330.41	0.362283	1.09e-06	9.64e-06	965.543	1066.08	-0.141106	0.0754811	0.172649
AT4G09040	-	740.804	596.346	0.304207	1.3e-05	9.5e-05	1199.59	822.209	0.538839	8.85e-23	2.21e-21	783.53	854.038	-0.117911	0.138837	0.400345	857.661	733.327	0.222355	0.000502459	0.00450183	1234.65	771.745	0.666004	1.64e-17	4.74e-16	560.084	760.593	-0.429634	4.91e-06	3.99e-05
AT4G31040	-	871.406	744.764	0.2233	0.000178821	0.00104407	1166.72	1026.86	0.183562	0.000504649	0.00262653	1145.77	1066.61	0.0994863	0.166254	0.445119	834.167	862.604	-0.0455638	0.436384	0.686274	1200.82	1128.34	0.0892872	0.223163	0.381427	818.829	894.7	-0.125775	0.113964	0.235988
AT1G32990	RPL11	2371.95	1906.73	0.314131	3.96e-16	7.97e-15	3600.04	2628.9	0.451707	2.53e-32	9.07e-31	2233.15	2730.67	-0.277326	0.000533722	0.0062613	2573.94	2347.98	0.130699	0.00142321	0.0110048	3705.22	2200.04	0.738192	2.32e-18	7.16e-17	1596.79	2435.39	-0.598465	4.64e-12	9.36e-11
AT2G24090	RPL35	1852.14	1586.92	0.219721	4.43e-07	4.07e-06	3004.94	2187.93	0.45445	2.84e-33	1.06e-31	1990.93	2272.67	-0.184287	0.00888901	0.0604403	2148.39	1833.43	0.226834	2.58e-08	5.49e-07	3092.79	1961.13	0.648352	2.99e-20	1.11e-18	1423.31	1901.64	-0.411636	5.91e-08	6.86e-07
AT5G40950	RPL27	3144.66	2641.18	0.251674	1.92e-14	3.46e-13	5088.93	3641.57	0.481232	4.21e-57	3.06e-55	3221.78	3782.55	-0.224477	0.000682965	0.00772699	3638.35	3112.88	0.222343	2.15e-11	6.6e-10	5237.7	3173.58	0.714012	1.16e-25	6.58e-24	2303.27	3228.76	-0.481532	1.87e-11	3.55e-10
AT5G01600	FER1	3811.5	3048.55	0.320704	8.53e-27	2.92e-25	7048.82	4203.21	0.743851	1.09e-158	2.93e-156	1918.22	4366	-1.14954	7.26e-65	5.42e-62	5039.62	3772.99	0.415221	7.1e-43	1.1e-40	7254.85	1889.55	1.91663	2.65e-168	1.08e-164	1371.37	3913.42	-1.49389	1.09e-93	8.79e-91
AT3G56090	FER3	345.356	162.238	1.04759	5.55e-23	1.6e-21	729.654	223.695	1.66312	2.26e-87	3.05e-85	161.269	232.347	-0.46362	0.000181541	0.0024897	521.657	341.865	0.57815	9.11e-13	3.15e-11	750.993	158.845	2.17058	1.42e-92	1.07e-89	115.28	354.597	-1.55426	8.85e-34	9.03e-32
AT5G01500	TAAC	270.356	320.288	-0.237214	0.0163589	0.0540039	327.909	441.599	-0.418814	2.15e-06	1.69e-05	397.872	458.683	-0.194304	0.0506383	0.21206	234.43	267.624	-0.175632	0.0805237	0.250486	337.504	391.797	-0.206255	0.0621963	0.147105	284.324	277.588	0.0312567	0.794358	0.882422
AT1G50900	LTD	706.591	687.943	0.039547	0.540664	0.713201	1149.56	948.517	0.274997	2.43e-07	2.18e-06	861.726	985.252	-0.185303	0.0129509	0.0799569	821.89	699.452	0.224605	0.000320613	0.00303979	1183.16	848.721	0.471745	5.1e-10	7.29e-09	615.939	725.477	-0.232285	0.00773005	0.0272992
AT2G48120	PAC	182.752	168.407	0.110049	0.389116	0.58003	302.459	232.206	0.366169	0.000559264	0.00287611	212.474	241.181	-0.158475	0.202693	0.49392	216.234	180.906	0.231901	0.0384205	0.150405	311.31	209.321	0.545218	1.45e-05	0.000104009	151.924	187.639	-0.284628	0.0536793	0.132428
AT4G18160	TPK3	164.244	200.312	-0.274331	0.0240332	0.0742878	183.627	276.186	-0.563626	1.13e-07	1.05e-06	268.275	286.883	-0.0868306	0.420044	0.709723	131.285	162.586	-0.266305	0.0286539	0.121754	188.995	264.228	-0.465501	0.00015664	0.000889233	191.757	168.632	0.180781	0.194736	0.348169
AT5G35220	EGY1	462.883	327.711	0.487886	1.56e-08	1.69e-07	676.624	451.845	0.572478	5.24e-15	8.94e-14	405.781	469.356	-0.19547	0.0440827	0.192145	483.757	458.205	0.0729854	0.340994	0.601891	696.403	399.571	0.783382	3.95e-17	1.12e-15	289.956	475.262	-0.695203	4.93e-11	8.91e-10
AT3G53920	SIGC	490.848	596.521	-0.277567	0.000191529	0.0011142	707.418	822.469	-0.214518	0.0004591	0.00241413	879.3	854.323	0.0413509	0.592499	0.825412	505.765	485.889	0.0567905	0.450921	0.697669	728.104	866.045	-0.24745	0.00254756	0.0104096	628.513	503.978	0.314009	0.00101384	0.00471669
AT5G24120	SIGE	481.524	799.567	-0.717433	8.27e-24	2.49e-22	671.364	1102.42	-0.704267	1.77e-31	6.23e-30	1222.75	1145.09	0.0905259	0.210495	0.50475	480.014	476.653	0.00979847	0.901338	0.960931	690.976	1204.11	-0.785837	5.37e-22	2.33e-20	873.811	494.42	0.803872	2.96e-18	1.1e-16
AT1G09530	PIF3	147.297	212.297	-0.495549	7.32e-05	0.000465676	229.107	292.703	-0.341751	0.000793468	0.00393976	309.573	304.034	0.0254537	0.80822	0.931054	163.794	145.806	0.143038	0.243595	0.499597	235.81	304.889	-0.359934	0.00226662	0.009392	221.261	151.245	0.521752	0.000225248	0.00125628
AT3G59060	PIF5	2008.09	2639.87	-0.393369	2.77e-25	8.87e-24	2611.64	3639.7	-0.477554	2.59e-41	1.22e-39	3802	3780.71	0.00770783	0.90235	0.966601	1867.18	1987.8	-0.0893179	0.029183	0.123348	2688	3743.9	-0.472989	2.47e-13	5.14e-12	2716.85	2061.79	0.393912	4.74e-09	6.51e-08
AT3G15840	PIFI	3557.01	3782.63	-0.0879019	0.00266741	0.0116248	4347.78	5215.38	-0.261751	4.75e-19	9.98e-18	6146.98	5417.3	0.178359	0.00200682	0.0184525	3108.44	3521.07	-0.178878	4.62e-08	9.39e-07	4474.9	6054.48	-0.432143	1.32e-12	2.53e-11	4393.98	3652.11	0.26437	2.4e-05	0.000167999
ATCG00490	RBCL	477.699	204.819	1.09791	1.84e-11	2.64e-10	558.1	282.385	0.83195	1.29e-05	9.06e-05	488.185	293.289	0.174496	0.295599	0.59917	398.973	472.874	-0.230369	0.0125351	0.065165	574.45	480.162	0.118493	0.704815	0.823243	348.345	490.465	-0.242705	0.462793	0.629213
AT1G67090	RBCS-1A	200054	147404	0.440423	0	0	245005	203235	0.269223	7.4e-38	3.19e-36	207520	211105	-0.0243135	0.618858	0.840769	175164	198033	-0.176478	1.21e-17	6.53e-16	252170	204380	0.300915	1.88e-08	2.17e-07	148322	205403	-0.466892	6.89e-20	2.96e-18
AT5G38430	RBCS-1B	19380.2	13064.2	0.563062	3.49e-25	1.11e-23	30895.8	18012.1	0.776539	2.92e-204	1.14e-201	17492.5	18710	-0.0935053	0.203721	0.495233	22089.3	19184.6	0.200227	1.66e-05	0.000217152	31798.9	17232.5	0.87079	1.35e-30	1.04e-28	12507.2	19897.9	-0.660017	8.63e-17	2.84e-15
AT5G38410	RBCS-2B	85258.7	74013	0.204097	2.28e-97	3.36e-95	117695	102046	0.205384	2.39e-18	4.88e-17	96905	105998	-0.127277	0.0100589	0.0663249	84144.4	84397.2	-0.00436535	0.849641	0.939031	121137	95435.5	0.341347	6.42e-10	9.08e-09	69258.1	87538.7	-0.33589	5.55e-11	9.97e-10
AT1G71720	RBLS	428.586	384.729	0.150145	0.0760857	0.184305	676.499	530.429	0.342947	1.1e-06	9.09e-06	503.689	550.968	-0.121374	0.18423	0.469497	483.667	424.256	0.180807	0.018005	0.0854205	696.275	496.094	0.477364	7.27e-08	7.68e-07	360.028	440.042	-0.280809	0.00586962	0.0215277
AT4G34830	MRL1	1192.03	930.112	0.355161	1.45e-11	2.11e-10	1662	1282.4	0.370843	1.41e-15	2.5e-14	1174.22	1332.09	-0.173108	0.0418979	0.185796	1188.24	1179.98	0.00894309	0.858515	0.942199	1710.59	1156.07	0.554649	8.45e-11	1.32e-09	838.869	1223.91	-0.534918	3.41e-09	4.78e-08
AT3G47450	ATNOS1	365.972	295.182	0.300068	0.000956728	0.00474039	593.542	406.975	0.532517	2.36e-12	3.41e-11	354.396	422.735	-0.238583	0.0139512	0.0846768	424.365	362.274	0.216735	0.00848017	0.0477834	610.886	349.002	0.789207	1.37e-16	3.7e-15	253.268	375.758	-0.553205	4.35e-07	4.35e-06
AT5G28500	RAF1.1	1394.22	1263.68	0.140453	0.00308788	0.0131408	2364.34	1742.3	0.437622	3.64e-27	1.1e-25	1732.67	1809.75	-0.0613846	0.346036	0.646389	1690.4	1380.14	0.288091	1.84e-10	5.07e-09	2433.47	1706.46	0.506787	4.72e-15	1.15e-13	1238.42	1431.49	-0.206808	0.00365401	0.0143981
AT3G04550	RAF1.2	679.879	470.937	0.518999	1.69e-12	2.63e-11	1049.58	649.301	0.681162	1.21e-26	3.62e-25	717.921	674.423	0.0861529	0.307524	0.611265	750.376	673.007	0.15121	0.0214814	0.0977312	1080.29	707.097	0.599554	1.83e-13	3.85e-12	513.161	698.071	-0.434575	1.47e-06	1.32e-05
AT5G51110	ATP1	1792.17	1844.72	-0.0433901	0.329734	0.522929	3366.12	2543.37	0.401246	3.07e-26	9.02e-25	2790.36	2641.85	0.0766774	0.225081	0.522127	2406.6	1774.07	0.435548	2.15e-26	1.83e-24	3464.54	2748.18	0.330728	5.33e-08	5.79e-07	1994.41	1840.07	0.115725	0.0864547	0.191672
AT2G28000	CPN60A1	3747.23	2161.53	0.790558	3.07e-131	6.47e-129	6208.41	2980.21	1.05519	1.45e-270	1.07e-267	2778.63	3095.6	-0.152507	0.0103581	0.0677681	4438.73	3709.36	0.257305	3.9e-17	2.02e-15	6389.91	2736.4	1.2132	1.49e-96	1.51e-93	1985.81	3847.44	-0.94607	2.14e-53	5.65e-51
AT4G04330	RBCX1	259.063	281.183	-0.112067	0.268399	0.456737	326.869	387.694	-0.23575	0.00883605	0.0327168	444.766	402.696	0.13468	0.173474	0.455269	233.709	256.445	-0.12195	0.227753	0.481665	336.416	438.126	-0.368253	0.00073096	0.00350907	317.98	265.991	0.248562	0.0369379	0.0987306
AT5G19855	RBCX2	663.732	771.518	-0.212609	0.000947821	0.0046999	899.246	1063.73	-0.239854	1.09e-05	7.71e-05	1114.79	1104.92	0.0127445	0.864285	0.952664	642.925	657.021	-0.0316046	0.632389	0.825087	925.531	1098.08	-0.243036	0.00219277	0.00912509	796.932	681.497	0.221047	0.013381	0.0431093
AT4G20130	PTAC14	456.733	299.2	0.588808	2.46e-10	3.23e-09	637.213	412.534	0.615148	3.51e-16	6.46e-15	353.725	428.52	-0.255141	0.0100484	0.0663113	455.577	452.124	0.0143082	0.86202	0.942707	655.841	348.36	0.888865	1.05e-20	4.1e-19	252.805	468.931	-0.859791	4.76e-14	1.19e-12
AT3G07670	-	525.847	461.785	0.182904	0.0157898	0.0524412	718.072	636.681	0.170719	0.00887779	0.0328163	653.356	661.348	-0.0181889	0.828695	0.939283	513.395	520.532	-0.0184483	0.800186	0.916296	739.061	643.373	0.197621	0.0209978	0.0618216	466.882	539.916	-0.206019	0.0312301	0.0862284
AT1G24610	-	322.008	243.465	0.389713	9.57e-05	0.000591831	416.763	335.687	0.301947	0.000650317	0.00329489	335.528	348.684	-0.0508488	0.619089	0.840877	297.948	318.758	-0.0915555	0.339473	0.600704	428.961	330.389	0.363644	0.00079716	0.00379291	239.752	330.603	-0.447679	0.000178138	0.00102045
AT1G01920	-	102.092	87.4494	0.204469	0.19398	0.365116	156.178	120.571	0.34983	0.00894512	0.0330356	130.262	125.238	0.0480028	0.73857	0.901279	111.667	101.059	0.119254	0.385626	0.642556	160.739	128.239	0.305553	0.047828	0.119816	93.0509	104.824	-0.159034	0.374249	0.549153
AT3G12780	PGK1	17294.4	16527.7	0.0654625	1.18e-05	8.69e-05	26703.8	22787.8	0.228539	2.05e-34	7.95e-33	26203.7	23670.2	0.144047	0.00580381	0.0432044	19092.1	17119.7	0.156855	6.03e-16	2.82e-14	27484.5	25808.6	0.0900556	0.0993111	0.210318	18730.1	17756.8	0.0764557	0.166411	0.310672
AT1G56190	PGK2	2901.71	2705.94	0.100163	0.00217539	0.00973269	4494.47	3730.83	0.267653	7.6e-19	1.59e-17	4082.72	3875.34	0.0732967	0.200989	0.491687	3213.34	2872.4	0.160557	1.7e-06	2.7e-05	4625.86	4020.64	0.200749	0.000544014	0.00269974	2917.78	2979.29	-0.0300077	0.622434	0.75883
AT1G79550	PGK3	1976.49	1976.4	0.000374507	0.992409	0.995367	2972.26	2724.98	0.124092	0.000580803	0.00297379	2727.68	2830.53	-0.0522024	0.377815	0.674765	2124.99	1956.51	0.116805	0.00488081	0.0305412	3059.18	2686.28	0.185502	0.00278603	0.0112393	1949.45	2029.37	-0.0575491	0.381735	0.555643
AT1G13440	GAPC2	10880.3	11469.7	-0.0761985	2.73e-05	0.000189141	17081	15813.9	0.111036	1.03e-07	9.68e-07	19098.4	16426.2	0.212884	0.000142646	0.00202355	12212.2	10770.3	0.180748	8.73e-17	4.32e-15	17580.3	18811.2	-0.0967696	0.0977221	0.207955	13652.1	11171.1	0.287004	1.31e-06	1.19e-05
AT3G04120	GAPC1	4714.1	5306.63	-0.171334	4.87e-11	6.75e-10	8346.08	7316.52	0.189631	2.83e-12	4.05e-11	7098.1	7599.9	-0.0963835	0.0858094	0.297571	5967.18	4666.48	0.353001	1.67e-30	1.6e-28	8589.98	6991.2	0.294346	8.7e-07	7.85e-06	5073.76	4840.15	0.0676581	0.269252	0.438791
AT3G26650	GAPA1	20201.8	22439.9	-0.151222	1.2e-25	3.94e-24	28367.4	30939.1	-0.125031	2.66e-11	3.53e-10	30274.8	32137.4	-0.0845766	0.0998444	0.328111	20281.5	19997.6	0.0201416	0.312417	0.575198	29196.6	29817.4	-0.0301667	0.574852	0.726464	21639.1	20742	0.060686	0.26399	0.432893
AT1G42970	GAPB	20228.3	23595	-0.222195	4.22e-50	2.81e-48	34940.9	32531.7	0.102787	1.2e-07	1.12e-06	35023.1	33791.7	0.0507096	0.330899	0.632691	24981	20023.9	0.318218	6.49e-62	1.64e-59	35962.5	34490.6	0.0598216	0.262161	0.426752	25029.6	20769.2	0.26746	5.26e-07	5.2e-06
AT1G12900	GAPA-2	21964.2	18858.1	0.220087	1.08e-53	7.76e-52	28073.1	26000.7	0.110505	1.55e-09	1.75e-08	21612.1	27007.6	-0.315848	7.19e-10	3.15e-08	20071	21742.2	-0.115219	1.95e-09	4.86e-08	28893.8	21285.7	0.437604	2.95e-16	7.77e-15	15447.5	22551.5	-0.542136	1.49e-23	8e-22
AT3G52930	FBA8	2065.31	1962.84	0.0714861	0.0724669	0.177276	3223.41	2706.28	0.250667	7.37e-13	1.1e-11	2581.29	2811.11	-0.118628	0.0718869	0.265935	2304.57	2044.45	0.171706	1.84e-05	0.000238602	3317.67	2542.18	0.378681	1.76e-08	2.04e-07	1844.86	2120.5	-0.197237	0.00635018	0.0230586
AT4G38970	FBA2	31254.9	35845.3	-0.197504	2.95e-55	2.18e-53	54124.7	49422.1	0.130856	3.54e-10	4.26e-09	55197.6	51336.3	0.102579	0.058046	0.231064	38696.2	30939.1	0.321623	2.32e-55	4.97e-53	55707.5	54355.8	0.035136	0.533817	0.694212	39445	32090.7	0.295616	7.34e-08	8.34e-07
AT4G26530	FBA5	2428.09	2997.14	-0.302231	4.21e-19	9.87e-18	3731.44	4132.3	-0.147525	8.84e-06	6.35e-05	5867	4292.33	0.440686	3.63e-14	2.57e-12	2667.74	2403.55	0.147718	0.00013154	0.00137626	3840.58	5777.63	-0.583601	8.43e-21	3.31e-19	4192.75	2493.01	0.74308	3.75e-32	3.47e-30
AT2G21330	FBA1	12212.8	13577	-0.152699	1.93e-20	4.89e-19	19884.2	18719.4	0.0867511	0.000185982	0.00106052	22412.9	19444.3	0.201004	0.000207428	0.00279336	14216.1	12089.4	0.232629	5.76e-22	4.09e-20	20465.8	22071.6	-0.108121	0.0605665	0.14424	16017	12539.3	0.350665	3.38e-10	5.47e-09
AT3G54050	CFBP1	7603.5	8421.25	-0.147763	3.19e-12	4.87e-11	12846.7	11610.8	0.145531	4.95e-11	6.41e-10	12278.9	12060.4	0.0253895	0.622188	0.84273	9184.78	7526.68	0.28629	7.94e-32	8.17e-30	13222.3	12092.7	0.127917	0.0159303	0.0490786	8775.84	7806.8	0.16769	0.00222456	0.00940393
AT3G55800	SBPASE	10145	9904.75	0.0345458	0.0646192	0.162204	15889.6	13656.4	0.218189	1.13e-24	3.07e-23	13822.9	14185.1	-0.0365543	0.487704	0.75842	11360.3	10042.5	0.177265	8.85e-16	4.07e-14	16354.2	13614.2	0.262441	1.68e-06	1.43e-05	9880.22	10416.2	-0.0756023	0.174063	0.320992
AT3G60750	TKL-1	12405.6	12239.8	0.0190435	0.272049	0.459888	19399.5	16875.7	0.20063	5.92e-23	1.49e-21	17860.7	17529.3	0.0264082	0.640212	0.851567	13869.7	12280.2	0.175109	5.29e-17	2.68e-15	19966.7	17587.9	0.181477	0.00155301	0.00677944	12763.2	12737.2	0.00291296	0.959609	0.978315
AT2G01290	RPI2	111.334	93.1922	0.234915	0.124606	0.265814	186.177	128.485	0.496119	0.000143926	0.000835821	135.159	133.464	0.0158325	0.910051	0.969761	133.096	110.208	0.224795	0.0932	0.276591	191.629	133.076	0.490453	0.00102828	0.0047469	96.5641	114.312	-0.225674	0.189583	0.341427
AT3G04790	RPI3	1096.58	1208.19	-0.139833	0.00942674	0.0341358	2260.55	1665.82	0.438296	9.59e-26	2.71e-24	1561.36	1730.35	-0.142243	0.0413639	0.183848	1616.2	1085.51	0.565002	4.42e-29	4.11e-27	2326.63	1537.67	0.589262	8.13e-18	2.41e-16	1115.88	1125.87	-0.0109982	0.891284	0.941589
AT5G61410	RPE	9077.5	7404.68	0.293916	2.65e-40	1.39e-38	11646.9	10209.4	0.189769	4.15e-15	7.13e-14	11807.9	10604.6	0.15222	0.00398488	0.0319713	8326.95	8985.78	-0.109715	4.41e-06	6.44e-05	11987.4	11628.8	0.0434603	0.413191	0.584371	8439.12	9320.19	-0.142327	0.00895925	0.0308871
AT3G55440	CTIMC	5410.53	5605.64	-0.051306	0.0407086	0.113306	8644.43	7728.9	0.161224	6.66e-11	8.5e-10	8601.52	8028.22	0.0975828	0.0822097	0.290067	6180.33	5355.87	0.205689	1.24e-13	4.75e-12	8897.17	8472.01	0.0698732	0.231472	0.391775	6148.44	5555.22	0.145329	0.0172458	0.053287
AT2G21170	TIM	4105.16	4653.29	-0.180184	8.39e-11	1.15e-09	7267.69	6415.77	0.17906	2.49e-10	3.01e-09	6427.52	6664.31	-0.0509206	0.38269	0.678782	5195.98	4063.68	0.351714	7.06e-31	6.87e-29	7480.22	6330.85	0.23824	9.64e-05	0.000579296	4594.56	4214.92	0.12334	0.0477234	0.121004

## Sheet: Table S5
gene_id	gene_name	PvsCK_P	PvsCK_CK	PvsCK_log2FoldChange	PvsCK_pvalue	PvsCK_padj	PandBvsCK_PandB	PandBvsCK_CK	PandBvsCK_log2FoldChange	PandBvsCK_pvalue	PandBvsCK_padj	BvsCK_B	BvsCK_CK	BvsCK_log2FoldChange	BvsCK_pvalue	BvsCK_padj	PandBvsP_PandB	PandBvsP_P	PandBvsP_log2FoldChange	PandBvsP_pvalue	PandBvsP_padj	PandBvsB_PandB	PandBvsB_B	PandBvsB_log2FoldChange	PandBvsB_pvalue	PandBvsB_padj
AT4G17600	LIL3.1	1337.18	1453.52	-0.119452	0.00927751	0.0337077	2506.34	2004.08	0.321327	6.05e-17	1.15e-15	1793.17	2081.67	-0.206232	0.00554507	0.0416622	1791.92	1323.67	0.430511	1.22e-21	8.56e-20	2579.61	1766.43	0.537246	2.6e-12	4.86e-11
AT4G34190	1-Sep	2619.5	2315.4	0.177374	6.51e-07	5.83e-06	3988.64	3192.4	0.319954	4.08e-23	1.03e-21	3549.81	3316.04	0.096042	0.0971569	0.322393	2851.66	2593.03	0.135595	0.000203404	0.00203326	4105.27	3496.14	0.229599	0.000112314	0.000662791
AT1G29920	LHCB1.1	85341.8	92389.8	-0.11451	1.23e-29	4.74e-28	133812	127383	0.0708824	0.00096986	0.00470006	115495	132316	-0.192395	0.000329659	0.00412169	95667.9	84479.6	0.178839	3.75e-18	2.11e-16	137726	113757	0.273455	2.57e-06	2.12e-05
AT1G29910	LHCB1.1	75913.2	73544.9	0.0456886	3.37e-06	2.7e-05	109269	101401	0.107597	2.5e-07	2.24e-06	75185.6	105327	-0.477944	5.69e-21	7.36e-19	78120.6	75146.2	0.0557859	0.00598902	0.0360183	112464	74050.4	0.598149	2.82e-27	1.75e-25
AT3G01440	PNSL3	232.978	209.568	0.148171	0.199235	0.371508	399.753	288.943	0.454454	2.41e-07	2.17e-06	309.107	300.135	0.0419703	0.692799	0.878836	285.803	230.619	0.279368	0.00672002	0.0395613	411.441	304.456	0.417983	8.58e-05	0.000521424
AT3G55330	PPL1	1246.72	1158.13	0.105818	0.0318404	0.0932507	1778.85	1596.81	0.154772	0.000426904	0.00225919	1495.02	1658.65	-0.144991	0.0337609	0.159152	1271.78	1234.12	0.0423078	0.388017	0.644582	1830.87	1472.52	0.310172	9.86e-06	7.28e-05
AT3G05410	PPD7	243.27	229.516	0.0779545	0.470744	0.654663	382.196	316.442	0.262797	0.00284689	0.0122811	311.737	328.696	-0.069781	0.498392	0.765072	273.246	240.816	0.168643	0.0907579	0.27158	393.375	307.014	0.344904	0.0010675	0.00490677
ATCG00300	PSBZ	6.59331	5.72687	0.0715066	0.784971	0.882537	18.7527	7.8964	0.683677	0.00952813	0.0348312	12.5449	8.19946	0.172761	0.332838	0.63427	13.4082	6.52682	0.317378	0.061941	0.210197	19.3004	12.35	0.430718	0.154005	0.293063
AT3G21055	PSBTN	11500	11434.6	0.00850717	0.658143	0.801065	16854.2	15765.6	0.0959545	0.000231693	0.00129954	15687.3	16376	-0.0604507	0.315358	0.617474	12049.7	11383.8	0.0813107	0.00160919	0.012217	17347.1	15452.1	0.165073	0.0104661	0.0346667
AT1G44575	PSBS	14484.2	13646.9	0.0855791	7.58e-07	6.71e-06	21413.9	18815.9	0.186493	2.53e-18	5.15e-17	19813.1	19544.4	0.0193275	0.733071	0.899331	15310.1	14337.9	0.0946686	1.63e-05	0.000213188	22039.8	19515.5	0.173882	0.00345001	0.0134919
AT1G71500	PSB33	2646.45	2966.25	-0.164744	5.53e-06	4.28e-05	4361.49	4089.75	0.0928272	0.0021429	0.00952768	4232.73	4248.1	-0.0054656	0.92644	0.976366	3118.29	2619.73	0.249457	1.47e-10	4.12e-09	4488.98	4168.77	0.106133	0.0851278	0.186891
AT5G42270	FTSH5	5580.65	5957.86	-0.0940527	7.27e-05	0.000463035	8833.87	8214.48	0.104671	1.68e-05	0.000115056	8451.92	8532.53	-0.0136067	0.806005	0.930046	6315.8	5524.26	0.192073	5.01e-13	1.78e-11	9092.13	8323.27	0.126597	0.0257123	0.0725271
AT1G68830	STN7	1948.16	2187.76	-0.165167	3.19e-05	0.000217273	2424.86	3016.43	-0.31333	4.2e-18	8.47e-17	3210.97	3133.22	0.0343956	0.562081	0.808412	1733.64	1928.48	-0.15249	0.000379429	0.00352836	2495.76	3162.14	-0.337954	4.48e-08	4.92e-07
AT2G20890	THF1	3383.39	3520.2	-0.0559856	0.0669174	0.166737	5844.55	4853.53	0.267726	3.4e-19	7.2e-18	4681.46	5041.52	-0.104384	0.0625523	0.242652	4178.67	3349.19	0.316031	3.01e-20	1.96e-18	6015.35	4610.65	0.380093	1.52e-10	2.31e-09
AT1G03600	PSB27-1	3691.31	4306.75	-0.222392	1.02e-14	1.87e-13	6585.6	5938.03	0.14936	1.88e-08	1.91e-07	5391.5	6167.95	-0.188863	0.00206107	0.0188174	4708.43	3654.03	0.363952	6.31e-32	6.56e-30	6778.11	5310.6	0.34807	5.02e-08	5.48e-07
AT4G28660	PSB28	1114.65	966.177	0.203971	9.56e-05	0.000591252	2009.96	1332.13	0.589434	8.45e-42	4.03e-40	1229.98	1383.72	-0.163228	0.029139	0.143782	1437.02	1103.38	0.374446	2.97e-14	1.18e-12	2068.73	1211.59	0.760273	9.77e-24	4.79e-22
AT1G54500	-	946.751	1406.33	-0.566397	8.98e-28	3.18e-26	2116.63	1939.02	0.126923	0.00245875	0.0107871	1837.8	2014.1	-0.127079	0.0640905	0.246596	1513.33	937.191	0.678216	1.34e-37	1.7e-35	2178.48	1810.23	0.263166	0.000271053	0.00145344
AT5G51545	LPA2	335.121	412.848	-0.293968	0.000690952	0.00353116	679.916	569.214	0.252983	0.000223152	0.00125505	609.847	591.262	0.0424881	0.631759	0.847747	486.127	331.737	0.522603	3.4e-10	9.11e-09	699.78	600.738	0.215495	0.0204304	0.060449
AT1G73060	LPA3	1249.66	1296.9	-0.0528461	0.27243	0.46033	2268.14	1788.14	0.340973	1.56e-16	2.9e-15	2005.79	1857.38	0.107967	0.089514	0.305932	1621.59	1237.04	0.383619	5.62e-16	2.65e-14	2334.47	1975.32	0.238312	0.000229877	0.00125383
AT4G19100	PAM68	174.69	176.307	-0.0116948	0.92419	0.962046	300.706	243.079	0.295301	0.00286086	0.0123306	212.901	252.496	-0.223921	0.04986	0.209736	214.993	172.923	0.280226	0.0119781	0.0628195	309.495	209.668	0.542046	4e-06	3.2e-05
AT1G67700	HHL1	3407.34	3248.08	0.0695422	0.0214754	0.0678843	4976.36	4478.35	0.15182	1.03e-07	9.67e-07	4284.43	4651.78	-0.11523	0.0700198	0.261321	3557.87	3372.91	0.075935	0.0179924	0.0854047	5121.84	4220.26	0.275992	3.21e-05	0.000215867
AT4G02530	-	2221.93	2117.58	0.0683344	0.0651699	0.163265	3499.34	2919.62	0.260186	3.51e-15	6.05e-14	2896.46	3032.69	-0.0646572	0.308777	0.612491	2501.88	2199.48	0.184458	9.67e-07	1.6e-05	3601.64	2852.95	0.332601	4.07e-07	3.86e-06
AT1G74070	CYP26-2	397.826	417.218	-0.0658434	0.428936	0.617261	689.833	575.246	0.257964	0.000104072	0.000619968	469.697	597.52	-0.329235	0.000146293	0.00206321	493.199	393.803	0.307711	9.42e-05	0.00102602	709.999	462.558	0.605768	5.88e-12	1.05e-10
AT3G01480	CYP38	3119.6	3193.64	-0.0341902	0.295679	0.486875	4673.88	4403.24	0.0858322	0.0043712	0.0178158	3910.99	4573.74	-0.220899	0.000110027	0.00160787	3341.65	3088.1	0.113196	0.00146126	0.0112423	4810.49	3851.98	0.317642	1.1e-07	1.13e-06
AT1G74730	-	1418.02	1481.08	-0.0622602	0.166249	0.327386	2192.4	2042.03	0.1013	0.0105636	0.0379636	1892.7	2121.12	-0.159477	0.0119059	0.0751073	1567.45	1403.69	0.156041	0.000674485	0.00580297	2256.51	1864.1	0.271859	3.7e-05	0.000245452
AT5G08050	-	1655.72	1499.76	0.14113	0.00183755	0.00839747	2638	2067.85	0.349791	6.4e-19	1.34e-17	1574.14	2147.91	-0.434552	4.9e-11	2.51e-09	1886.02	1639	0.200558	4.84e-06	7.03e-05	2715.14	1550.42	0.798799	1.82e-33	1.7e-31
AT2G45770	CPFTSY	527.531	481.058	0.128583	0.0928507	0.213611	752.255	663.279	0.180781	0.00506309	0.0202656	636.096	688.962	-0.108205	0.190904	0.47805	537.841	522.206	0.0440244	0.55039	0.770312	774.236	626.447	0.299387	0.00039757	0.0020408
AT2G47450	CAO	4215.06	4655.85	-0.143096	9.48e-08	9.44e-07	7586.6	6419.29	0.240089	1.93e-19	4.11e-18	6443.42	6667.93	-0.0482619	0.397703	0.691739	5424	4172.48	0.375617	4.66e-37	5.76e-35	7808.44	6346.45	0.296199	7.69e-07	7e-06
ATCG00520	YCF4	9.26957	3.79809	0.496558	0.0603174	0.15384	14.1213	5.23659	0.669664	0.0115213	0.0409421	12.6968	5.44108	0.287245	0.0892887	0.305431	10.0962	9.17586	0.0438843	0.796607	0.9149	14.5341	12.4842	0.145358	0.639665	0.778063
AT3G11670	DGD1	605.909	651.125	-0.101251	0.156396	0.313871	793.125	897.74	-0.176907	0.00439505	0.017902	837.769	932.534	-0.147844	0.0693676	0.259887	567.039	599.79	-0.0788766	0.276577	0.538381	816.32	824.932	-0.0149963	0.861164	0.925725
AT5G08720	-	406.982	457.191	-0.165925	0.0428079	0.117942	529.429	630.365	-0.244488	0.000720804	0.00362061	594.594	654.768	-0.133705	0.117548	0.361904	378.537	402.874	-0.0810449	0.344125	0.604519	544.892	585.516	-0.0984546	0.3003	0.469099
AT1G20340	DRT112	34788.1	39396.4	-0.179529	8.72e-48	5.41e-46	60099.7	54318.1	0.145766	4.68e-17	8.94e-16	50417.2	56421.3	-0.158723	0.00560011	0.0420431	42968.6	34436.6	0.318701	7.07e-76	2.41e-73	61856.6	49660.4	0.313879	1.71e-07	1.7e-06
AT1G60950	FD2	18059.8	16506.5	0.129099	5.37e-13	8.69e-12	31961.2	22758.4	0.489041	6.3e-101	1.08e-98	17225.8	23639.5	-0.441316	3.42e-10	1.57e-08	22851.1	17877.3	0.353122	7.26e-55	1.54e-52	32895.3	16969.4	0.941548	2.74e-37	3.31e-35
AT1G32550	FdC1	496.193	528.673	-0.0886139	0.238897	0.421066	837.643	728.925	0.19885	0.00120074	0.00569571	681.981	757.133	-0.140792	0.112222	0.351545	598.882	491.18	0.274501	0.000111965	0.00119241	862.127	671.824	0.350806	0.000101338	0.000605408
AT1G30510	RFNR2	206.55	213.718	-0.0529631	0.653651	0.797783	350.221	294.652	0.239036	0.00979608	0.0356272	370.25	306.071	0.252014	0.0147341	0.0881778	250.391	204.466	0.269849	0.0109546	0.0587121	360.46	364.609	-0.015935	0.877149	0.935159
AT5G49740	FRO7	1966.45	3329.73	-0.756972	3.51e-99	5.38e-97	2362.05	4590.88	-0.954862	5.5e-176	1.79e-173	5115.3	4768.73	0.0985498	0.0986943	0.325434	1688.76	1946.58	-0.201924	1.13e-06	1.85e-05	2431.11	5037.22	-1.04031	2.28e-62	9.09e-60
AT3G18890	TIC62	2233.77	1816.83	0.296065	3.12e-13	5.13e-12	3356.08	2505.03	0.420338	6.48e-30	2.15e-28	2276.37	2602.04	-0.18522	0.015583	0.0919057	2399.41	2211.21	0.117224	0.00280614	0.0194012	3454.22	2241.27	0.614738	9.05e-16	2.29e-14
AT4G23890	ndhS	572.564	616.399	-0.10468	0.133187	0.279012	712.166	849.883	-0.252089	6.46e-05	0.000401638	965.371	882.78	0.122762	0.14495	0.410495	509.147	566.781	-0.14893	0.0392777	0.15285	733	950.968	-0.367802	5.89e-05	0.00037274
AT3G21200	GLUTRBP	562.356	528.301	0.088894	0.217514	0.395368	949.853	728.41	0.379011	1.78e-10	2.17e-09	707.708	756.629	-0.0918366	0.256996	0.558769	679.108	556.675	0.27718	3.6e-05	0.000436286	977.615	697.049	0.480121	2.23e-09	2.94e-08
AT4G04640	ATPC1	13182.2	13782	-0.0641271	0.000119328	0.000723819	20181.7	19002.2	0.0868055	1.11e-05	7.84e-05	18636.9	19738	-0.0814039	0.106761	0.341885	14429	13049	0.144609	2.61e-12	8.67e-11	20771.7	18354.7	0.177221	0.000697347	0.00336449
AT4G09650	ATPD	10120.6	10427.8	-0.0437885	0.0226478	0.0708273	16339.9	14377.4	0.184422	2.92e-15	5.04e-14	11222.6	14934.2	-0.402291	1.3e-11	7.1e-10	11682.5	10018.3	0.221093	3.91e-17	2.02e-15	16817.4	11054.3	0.598961	4.59e-21	1.85e-19
AT4G01800	AGY1	2511.97	2602.22	-0.049342	0.171797	0.334763	4039.98	3587.85	0.170977	9.42e-08	8.87e-07	3869.95	3726.83	0.0523932	0.457699	0.739149	2888.43	2486.59	0.212891	1.48e-08	3.28e-07	4158.07	3810.41	0.124487	0.0826028	0.182611
AT4G30825	-	227.372	199.284	0.182781	0.107171	0.237854	334.428	274.763	0.274913	0.00344955	0.0145152	233.21	285.411	-0.267891	0.0164479	0.09531	239.107	225.076	0.0787555	0.447791	0.69511	344.199	229.68	0.56687	7.13e-07	6.52e-06
AT5G36170	PRFB1	796.943	748.462	0.0897189	0.161776	0.321656	1168.23	1031.98	0.178457	0.000977837	0.00473448	1105.07	1071.94	0.0428144	0.563305	0.808644	835.232	788.897	0.0808014	0.180391	0.419901	1202.38	1088.35	0.141948	0.0504901	0.12519
AT2G35410	-	1038.32	1066.71	-0.0385817	0.46197	0.646664	1666.96	1470.73	0.18011	0.000103478	0.000616616	1350.71	1527.67	-0.171986	0.0143441	0.08652	1191.83	1027.83	0.209597	9.26e-05	0.00101177	1715.67	1330.41	0.362283	1.09e-06	9.64e-06
AT4G09040	-	740.804	596.346	0.304207	1.3e-05	9.5e-05	1199.59	822.209	0.538839	8.85e-23	2.21e-21	783.53	854.038	-0.117911	0.138837	0.400345	857.661	733.327	0.222355	0.000502459	0.00450183	1234.65	771.745	0.666004	1.64e-17	4.74e-16
AT1G32990	RPL11	2371.95	1906.73	0.314131	3.96e-16	7.97e-15	3600.04	2628.9	0.451707	2.53e-32	9.07e-31	2233.15	2730.67	-0.277326	0.000533722	0.0062613	2573.94	2347.98	0.130699	0.00142321	0.0110048	3705.22	2200.04	0.738192	2.32e-18	7.16e-17
AT2G24090	RPL35	1852.14	1586.92	0.219721	4.43e-07	4.07e-06	3004.94	2187.93	0.45445	2.84e-33	1.06e-31	1990.93	2272.67	-0.184287	0.00888901	0.0604403	2148.39	1833.43	0.226834	2.58e-08	5.49e-07	3092.79	1961.13	0.648352	2.99e-20	1.11e-18
AT5G40950	RPL27	3144.66	2641.18	0.251674	1.92e-14	3.46e-13	5088.93	3641.57	0.481232	4.21e-57	3.06e-55	3221.78	3782.55	-0.224477	0.000682965	0.00772699	3638.35	3112.88	0.222343	2.15e-11	6.6e-10	5237.7	3173.58	0.714012	1.16e-25	6.58e-24
AT5G01600	FER1	3811.5	3048.55	0.320704	8.53e-27	2.92e-25	7048.82	4203.21	0.743851	1.09e-158	2.93e-156	1918.22	4366	-1.14954	7.26e-65	5.42e-62	5039.62	3772.99	0.415221	7.1e-43	1.1e-40	7254.85	1889.55	1.91663	2.65e-168	1.08e-164
AT3G56090	FER3	345.356	162.238	1.04759	5.55e-23	1.6e-21	729.654	223.695	1.66312	2.26e-87	3.05e-85	161.269	232.347	-0.46362	0.000181541	0.0024897	521.657	341.865	0.57815	9.11e-13	3.15e-11	750.993	158.845	2.17058	1.42e-92	1.07e-89
AT5G01500	TAAC	270.356	320.288	-0.237214	0.0163589	0.0540039	327.909	441.599	-0.418814	2.15e-06	1.69e-05	397.872	458.683	-0.194304	0.0506383	0.21206	234.43	267.624	-0.175632	0.0805237	0.250486	337.504	391.797	-0.206255	0.0621963	0.147105
AT1G50900	LTD	706.591	687.943	0.039547	0.540664	0.713201	1149.56	948.517	0.274997	2.43e-07	2.18e-06	861.726	985.252	-0.185303	0.0129509	0.0799569	821.89	699.452	0.224605	0.000320613	0.00303979	1183.16	848.721	0.471745	5.1e-10	7.29e-09
AT2G48120	PAC	182.752	168.407	0.110049	0.389116	0.58003	302.459	232.206	0.366169	0.000559264	0.00287611	212.474	241.181	-0.158475	0.202693	0.49392	216.234	180.906	0.231901	0.0384205	0.150405	311.31	209.321	0.545218	1.45e-05	0.000104009
AT4G18160	TPK3	164.244	200.312	-0.274331	0.0240332	0.0742878	183.627	276.186	-0.563626	1.13e-07	1.05e-06	268.275	286.883	-0.0868306	0.420044	0.709723	131.285	162.586	-0.266305	0.0286539	0.121754	188.995	264.228	-0.465501	0.00015664	0.000889233
AT3G15840	PIFI	3557.01	3782.63	-0.0879019	0.00266741	0.0116248	4347.78	5215.38	-0.261751	4.75e-19	9.98e-18	6146.98	5417.3	0.178359	0.00200682	0.0184525	3108.44	3521.07	-0.178878	4.62e-08	9.39e-07	4474.9	6054.48	-0.432143	1.32e-12	2.53e-11
AT1G67090	RBCS-1A	200054	147404	0.440423	0	0	245005	203235	0.269223	7.4e-38	3.19e-36	207520	211105	-0.0243135	0.618858	0.840769	175164	198033	-0.176478	1.21e-17	6.53e-16	252170	204380	0.300915	1.88e-08	2.17e-07
AT5G38430	RBCS-1B	19380.2	13064.2	0.563062	3.49e-25	1.11e-23	30895.8	18012.1	0.776539	2.92e-204	1.14e-201	17492.5	18710	-0.0935053	0.203721	0.495233	22089.3	19184.6	0.200227	1.66e-05	0.000217152	31798.9	17232.5	0.87079	1.35e-30	1.04e-28
AT1G71720	-	428.586	384.729	0.150145	0.0760857	0.184305	676.499	530.429	0.342947	1.1e-06	9.09e-06	503.689	550.968	-0.121374	0.18423	0.469497	483.667	424.256	0.180807	0.018005	0.0854205	696.275	496.094	0.477364	7.27e-08	7.68e-07
AT3G47450	ATNOS1	365.972	295.182	0.300068	0.000956728	0.00474039	593.542	406.975	0.532517	2.36e-12	3.41e-11	354.396	422.735	-0.238583	0.0139512	0.0846768	424.365	362.274	0.216735	0.00848017	0.0477834	610.886	349.002	0.789207	1.37e-16	3.7e-15
AT5G28500	RAF1.1	1394.22	1263.68	0.140453	0.00308788	0.0131408	2364.34	1742.3	0.437622	3.64e-27	1.1e-25	1732.67	1809.75	-0.0613846	0.346036	0.646389	1690.4	1380.14	0.288091	1.84e-10	5.07e-09	2433.47	1706.46	0.506787	4.72e-15	1.15e-13
AT5G51110	ATP1	1792.17	1844.72	-0.0433901	0.329734	0.522929	3366.12	2543.37	0.401246	3.07e-26	9.02e-25	2790.36	2641.85	0.0766774	0.225081	0.522127	2406.6	1774.07	0.435548	2.15e-26	1.83e-24	3464.54	2748.18	0.330728	5.33e-08	5.79e-07
AT2G28000	CPN60A1	3747.23	2161.53	0.790558	3.07e-131	6.47e-129	6208.41	2980.21	1.05519	1.45e-270	1.07e-267	2778.63	3095.6	-0.152507	0.0103581	0.0677681	4438.73	3709.36	0.257305	3.9e-17	2.02e-15	6389.91	2736.4	1.2132	1.49e-96	1.51e-93
AT4G04330	RBCX1	259.063	281.183	-0.112067	0.268399	0.456737	326.869	387.694	-0.23575	0.00883605	0.0327168	444.766	402.696	0.13468	0.173474	0.455269	233.709	256.445	-0.12195	0.227753	0.481665	336.416	438.126	-0.368253	0.00073096	0.00350907
AT3G07670	-	525.847	461.785	0.182904	0.0157898	0.0524412	718.072	636.681	0.170719	0.00887779	0.0328163	653.356	661.348	-0.0181889	0.828695	0.939283	513.395	520.532	-0.0184483	0.800186	0.916296	739.061	643.373	0.197621	0.0209978	0.0618216
AT1G01920	-	102.092	87.4494	0.204469	0.19398	0.365116	156.178	120.571	0.34983	0.00894512	0.0330356	130.262	125.238	0.0480028	0.73857	0.901279	111.667	101.059	0.119254	0.385626	0.642556	160.739	128.239	0.305553	0.047828	0.119816
AT1G56190	-	2901.71	2705.94	0.100163	0.00217539	0.00973269	4494.47	3730.83	0.267653	7.6e-19	1.59e-17	4082.72	3875.34	0.0732967	0.200989	0.491687	3213.34	2872.4	0.160557	1.7e-06	2.7e-05	4625.86	4020.64	0.200749	0.000544014	0.00269974
AT1G79550	PGK3	1976.49	1976.4	0.000374507	0.992409	0.995367	2972.26	2724.98	0.124092	0.000580803	0.00297379	2727.68	2830.53	-0.0522024	0.377815	0.674765	2124.99	1956.51	0.116805	0.00488081	0.0305412	3059.18	2686.28	0.185502	0.00278603	0.0112393
AT3G04120	GAPC1	4714.1	5306.63	-0.171334	4.87e-11	6.75e-10	8346.08	7316.52	0.189631	2.83e-12	4.05e-11	7098.1	7599.9	-0.0963835	0.0858094	0.297571	5967.18	4666.48	0.353001	1.67e-30	1.6e-28	8589.98	6991.2	0.294346	8.7e-07	7.85e-06
AT1G42970	GAPB	20228.3	23595	-0.222195	4.22e-50	2.81e-48	34940.9	32531.7	0.102787	1.2e-07	1.12e-06	35023.1	33791.7	0.0507096	0.330899	0.632691	24981	20023.9	0.318218	6.49e-62	1.64e-59	35962.5	34490.6	0.0598216	0.262161	0.426752
AT3G52930	FBA8	2065.31	1962.84	0.0714861	0.0724669	0.177276	3223.41	2706.28	0.250667	7.37e-13	1.1e-11	2581.29	2811.11	-0.118628	0.0718869	0.265935	2304.57	2044.45	0.171706	1.84e-05	0.000238602	3317.67	2542.18	0.378681	1.76e-08	2.04e-07
AT4G38970	FBA2	31254.9	35845.3	-0.197504	2.95e-55	2.18e-53	54124.7	49422.1	0.130856	3.54e-10	4.26e-09	55197.6	51336.3	0.102579	0.058046	0.231064	38696.2	30939.1	0.321623	2.32e-55	4.97e-53	55707.5	54355.8	0.035136	0.533817	0.694212
AT3G54050	CFBP1	7603.5	8421.25	-0.147763	3.19e-12	4.87e-11	12846.7	11610.8	0.145531	4.95e-11	6.41e-10	12278.9	12060.4	0.0253895	0.622188	0.84273	9184.78	7526.68	0.28629	7.94e-32	8.17e-30	13222.3	12092.7	0.127917	0.0159303	0.0490786
AT3G55800	SBPASE	10145	9904.75	0.0345458	0.0646192	0.162204	15889.6	13656.4	0.218189	1.13e-24	3.07e-23	13822.9	14185.1	-0.0365543	0.487704	0.75842	11360.3	10042.5	0.177265	8.85e-16	4.07e-14	16354.2	13614.2	0.262441	1.68e-06	1.43e-05
AT3G60750	TKL-1	12405.6	12239.8	0.0190435	0.272049	0.459888	19399.5	16875.7	0.20063	5.92e-23	1.49e-21	17860.7	17529.3	0.0264082	0.640212	0.851567	13869.7	12280.2	0.175109	5.29e-17	2.68e-15	19966.7	17587.9	0.181477	0.00155301	0.00677944
AT2G01290	RPI2	111.334	93.1922	0.234915	0.124606	0.265814	186.177	128.485	0.496119	0.000143926	0.000835821	135.159	133.464	0.0158325	0.910051	0.969761	133.096	110.208	0.224795	0.0932	0.276591	191.629	133.076	0.490453	0.00102828	0.0047469
AT3G04790	RPI3	1096.58	1208.19	-0.139833	0.00942674	0.0341358	2260.55	1665.82	0.438296	9.59e-26	2.71e-24	1561.36	1730.35	-0.142243	0.0413639	0.183848	1616.2	1085.51	0.565002	4.42e-29	4.11e-27	2326.63	1537.67	0.589262	8.13e-18	2.41e-16
AT3G55440	CTIMC	5410.53	5605.64	-0.051306	0.0407086	0.113306	8644.43	7728.9	0.161224	6.66e-11	8.5e-10	8601.52	8028.22	0.0975828	0.0822097	0.290067	6180.33	5355.87	0.205689	1.24e-13	4.75e-12	8897.17	8472.01	0.0698732	0.231472	0.391775
AT2G21170	TIM	4105.16	4653.29	-0.180184	8.39e-11	1.15e-09	7267.69	6415.77	0.17906	2.49e-10	3.01e-09	6427.52	6664.31	-0.0509206	0.38269	0.678782	5195.98	4063.68	0.351714	7.06e-31	6.87e-29	7480.22	6330.85	0.23824	9.64e-05	0.000579296
